# Supplementary material for: Zinc oxide nanostructured films produced via anodization: a rational design approach
Source: Royal Society of Chemistry journal article supplement (doi:10.1039/c3ra43886d), 2013-01-01
Supplement: c3ra43886d.pdf [file c3ra43886d.pdf]

Cite this: DOI: 10.1039/c0xx00000x

www.rsc.org/xxxxxx

ARTICLE TYPE

Supplementary information

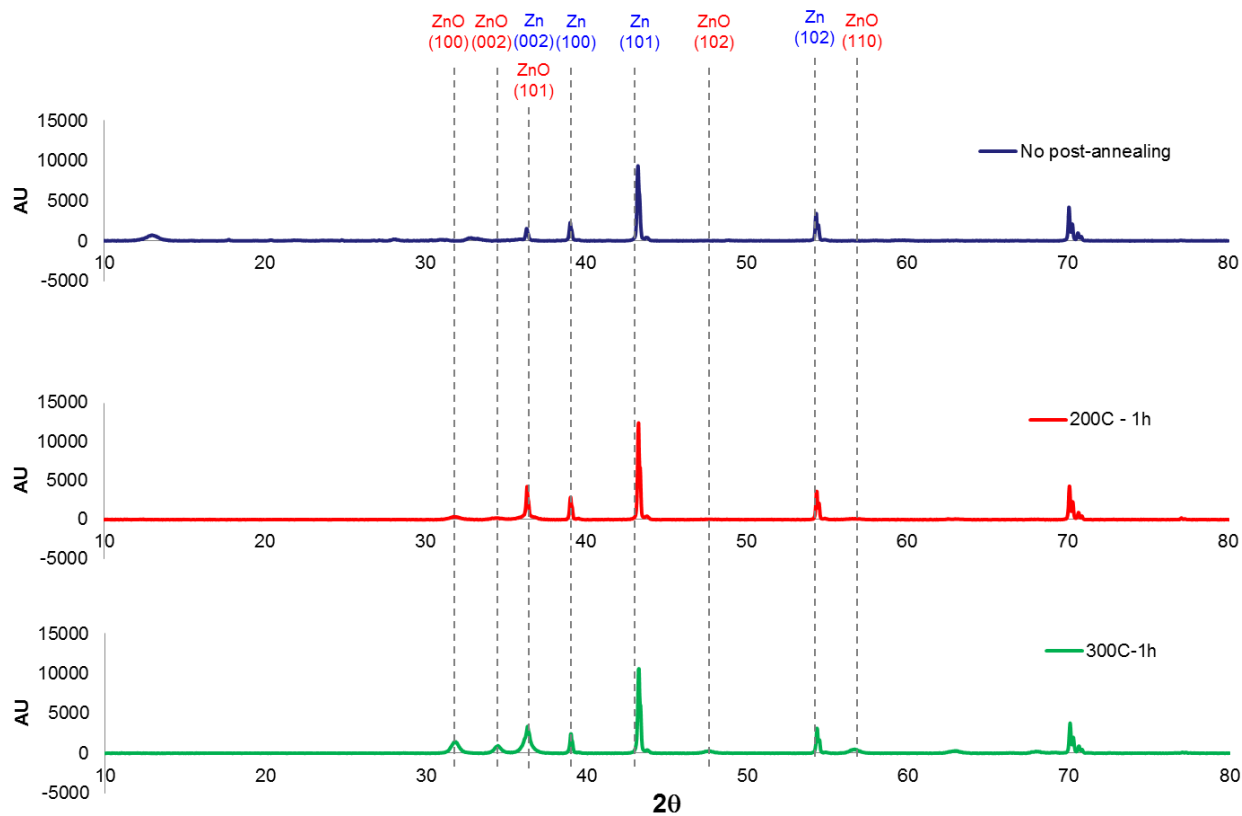

Fig S1. XRD pattern of non-annealed (a) and post annealed (b,c) ZnO nanostructured films produced with  $\text{KHCO}_3$  (0.1M)

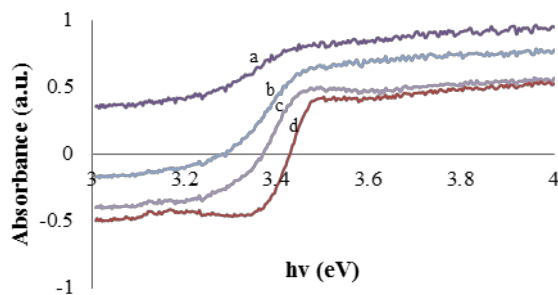

Fig S2. UV/Vis absorbance intensity spectra of ZnO films produced using 0.1 M sodium hydroxide as the electrolyte and different anodization conditions: a) 40 V, 1 h, 10 °C; b) 40 V, 1 h, 0 °C; c) 1 V, 1 h, 10 °C; d) 40 V, 1 min, 10 °C.

Cite this: DOI: 10.1039/c0xx00000x

www.rsc.org/xxxxxx

# ARTICLE TYPE

5

**Table S1.** Detailed effects on morphology for each parameter combination. Green colour represents the anodization conditions where specific nanostructures can be obtained.

| Anodization conditions \ Nanostructures | Low pH           | Low pH          | Low pH            | Low pH           | Neutral pH       | Neutral pH      | Neutral pH        | Neutral pH       | High pH          | High pH         | High pH           | High pH          |
|-----------------------------------------|------------------|-----------------|-------------------|------------------|------------------|-----------------|-------------------|------------------|------------------|-----------------|-------------------|------------------|
|                                         | Low V<br>Short t | Low V<br>Long t | High V<br>Short t | High V<br>long t | Low V<br>Short t | Low V<br>Long t | High V<br>Short t | High V<br>long t | Low V<br>Short t | Low V<br>Long t | High V<br>Short t | High V<br>long t |
| No nanostructure                        |                  |                 |                   |                  |                  |                 |                   |                  |                  |                 |                   |                  |
| Pitting - corrosion                     |                  |                 |                   |                  |                  |                 |                   |                  |                  |                 |                   |                  |
| 1D aligned arrays - Hydrophobic         |                  |                 |                   |                  |                  |                 |                   |                  |                  |                 |                   |                  |
| 1D aligned arrays - Hydrophilic         |                  |                 |                   |                  |                  |                 |                   |                  |                  |                 |                   |                  |
| 2D arrays - Hydrophobic                 |                  |                 |                   |                  |                  |                 |                   |                  |                  |                 |                   |                  |
| 2D arrays - Hydrophilic                 |                  |                 |                   |                  |                  |                 |                   |                  |                  |                 |                   |                  |
| 3D arrays - Hydrophobic                 |                  |                 |                   |                  |                  |                 |                   |                  |                  |                 |                   |                  |
| 3D arrays - Hydrophilic                 |                  |                 |                   |                  |                  |                 |                   |                  |                  |                 |                   |                  |

10
